# Supplementary material for: The Impact of Long-Term Macrolide Exposure on the Gut Microbiome and Its Implications for Metabolic Control
Source: PubMed Central journal article supplement (PMC10433835; doi:10.1128/spectrum.00831-23), 2023-06-22
Supplement: spectrum.00831-23-s0001.pdf [file spectrum.00831-23-s0001.pdf]

1 **SUPPLEMENTARY MATERIAL**

2

3 **Long-term macrolide exposure influences metabolic control through alteration of the**  
4 **gut microbiome**

5

6 Jocelyn M Choo<sup>1,2</sup>, Alyce Martin<sup>3</sup>, Steven L Taylor<sup>1,2</sup>, Emily Sun<sup>3</sup>, Fredrick M Mobegi<sup>1,2</sup>,  
7 Tokuya Kanno<sup>4</sup>, Alyson Richard<sup>1,2</sup>, Lucy D Burr<sup>5,6</sup>, Stevie Lingman<sup>5</sup>, Megan Martin<sup>5</sup>, Damien  
8 J Keating<sup>3,7</sup>, A James Mason<sup>4</sup>, Geraint B Rogers<sup>1,2\*</sup>

9

10 **Human cohort**

11 Healthy adults were included to the study if they had not taken any antibiotics in the preceding  
12 three months, or macrolide antibiotics in the preceding 12 months, had not experienced  
13 respiratory illness in the preceding month and a non-smoker. Subjects were excluded from the  
14 study if they had illicit drug use, current use of medications including medications prolonging  
15 QT interval, immunomodulators and corticosteroids, had a chronic lung disease (including  
16 asthma), have a current or previous medical history including cardiac disease, active  
17 arrhythmia, hepatic disease, active malignancy, immunosuppression and allergy to macrolide  
18 antibiotics, women who are pregnant or have been pregnant in the preceding six months, breast-  
19 feeding individuals (pregnancy category C) and if they have significant hospital contact or are  
20 based within a healthcare setting. Safety assessments, including screening based on medical  
21 history and an electrocardiogram (ECG) for long QTc, were performed on subjects  
22 immediately prior to the commencement of antibiotics (baseline), week one and week four of  
23 macrolide treatment.

24 A twice-daily regimen was chosen for both macrolide groups to maximise adherence.

25 Azithromycin and erythromycin capsules (Alphapharm Research Ltd, Queensland, Australia)

26 were prepared by Mater Health Pharmacy. Subjects were allocated (1:1) to azithromycin or  
27 erythromycin using concealed random allocation from a computer-generated random numbers  
28 table with permuted blocks of 2 or 4. All study personnel and investigators involved in sample  
29 processing and data entry were blinded to the treatment assignment, however the patients were  
30 not. This was felt acceptable as all outcomes were microbiological, not patient-orientated, and  
31 therefore not subject to bias. Primary outcomes and sample size calculation are as previously  
32 detailed (Burr et al., 2022).

33 To further assess whether the sample sizes was sufficient for gut microbiome analysis, power  
34 calculation was also performed based on previous human studies that assessed macrolide-  
35 associated effects on the gut microbiome, which includes a short-term (3-day) course of  
36 10mg/kg azithromycin in children(Wei et al., 2018), and a single course of 20mg/kg  
37 azithromycin treatment in children aged up to 60-months with gut microbiome analysis  
38 performed five days after the antibiotic treatment (Doan et al., 2017). The effect size calculated  
39 for changes in gut microbial diversity were 0.64 and 0.73, respectively. Therefore, a sample  
40 size of at least 19 is required to achieve a type 1 error rate of 5% and power of 0.9.

41

## 42 **Mice studies**

43 Female C57BL/6 mice were bred at the SAHMRI Bioresources animal facility, while female  
44 germ-free C57BL/6 mice were obtained from the Translational Research Institute (Queensland,  
45 Australia). All mice were acclimatized for a period of two weeks prior to study commencement  
46 and maintained at  $22^{\circ}\text{C} \pm 2^{\circ}\text{C}$  under a 12-hr light-dark cycle (lights on between 0700 and 1900)  
47 throughout the study period. Faecal pellet collection prior to antibiotic treatment (20mg/kg  
48 erythromycin ethylsuccinate, supplemented in drinking water) and at day 90 was performed by  
49 placing mice into individual clean cages. Faecal pellets were collected into a 1.5mL Eppendorf

50 tube using sterile toothpicks and stored at  $-80^{\circ}\text{C}$  until use. At the end of each study, mice were  
51 humanely killed by carbon dioxide inhalation.

52

53 The dosage of erythromycin used in mice studies were determined based on a correction factor  
54 ( $K_m$ ) to convert between dosages in animal studies and the human equivalent dose (HED) (Nair  
55 et al., 2016), which take into account differences in body size and drug clearance rates. The  
56 correction factor ( $K_m$ ) was determined based on the ratio of the calculated average body weight  
57 (kg) to body surface area ( $\text{m}^2$ ) between species. Using this calculation, the resulting correction  
58 factor ( $K_m$ ) value for human to mice dose conversion is reported to be 12.3, which dosage is  
59 divided by 10 as a safety measure.(Nair et al., 2016) To determine the corresponding dose for  
60 low-dose erythromycin studies in mice, we performed calculations based on an average human  
61 BMI of 60kg, 800mg/day of erythromycin ethylsuccinate in humans, a correction factor of 12.3  
62 and a safety dose of 0.1. In accordance with the calculation  $(800\text{mg}/60\text{kg}) * 12.3 * 0.1$ , the  
63 equivalent dosage for low-dose erythromycin in mice was estimated to be 16.4mg/kg.  
64 Therefore, a dosage at 20mg/kg erythromycin ethylsuccinate (20% surplus) was administered  
65 to account for potential variation in drinking water intake.

66

### 67 **Bioinformatics and statistical analysis**

68 Using shotgun metagenomics sequencing on human faecal samples, high quality reads were  
69 obtained at an average  $\pm$  standard deviation of  $42.2 \pm 8.9$  million reads per sample and a base  
70 call Q30 of  $88.6 \pm 1.0\%$ . Quality trimming and adapter removal were performed on paired-end  
71 reads using Trimmomatic v0.39 (Truong et al., 2015), based on the parameters TruSeq3-  
72 PE.fa:3:30:10 MINLEN:36 HEADCROP:10, followed by quality checking of the sequence  
73 reads using FASTQC (v0.11.9). Contaminating human sequence reads were removed based on  
74 the human reference genome (GRCh38) using Bowtie2 (v2.3.5.1) with default parameters.

75 Downstream analysis of samples was performed according to previous parameters (Mobegi et  
76 al., 2020), resulting in  $22.3 \pm 2.9$  million quality-filtered reads of at least 138 nucleotides and  
77 a Q30 score of  $\geq 20$ .

78

79 To calculate between-sample dissimilarity for microbiota composition analysis, Bray Curtis  
80 distances were computed on square root-transformed species relative abundances for shotgun  
81 metagenomics data, and weighted Unifrac distances were computed on genus-level relative  
82 abundances using QIIME2 for 16S rRNA amplicon sequencing data.

83

#### 84 **Measurements of host physiology**

85 Faecal pH was measured using a FE20 FiveEasy™ pH meter (Mettler-Toledo AG,  
86 Schwerzenbach, Switzerland). Human faecal samples were diluted in 2x volume deionized  
87 water (Choo et al., 2021a), and mouse faecal pellets were diluted in 9x deionized water, prior  
88 to determination of pH (Choo et al., 2021b). Gastrointestinal transit time in mice was assessed  
89 using carmine red dye (3% w/v solution in 0.5% methylcellulose) (Sigma-Aldrich, St Louis,  
90 USA). Mice received an oral gavage of 150  $\mu$ L of carmine red dye solution and faecal output  
91 was monitored every 30 min or upon spontaneous passing of faecal pellets (Dey et al., 2015).  
92 Time from gavage to appearance of bright red dye in faecal pellets was recorded as gut transit  
93 time. Mouse caecum weight was recorded at the end of the study.

94

#### 95 **ELISA analysis**

96 Serum cytokine and hormone levels were quantitated using a combination of commercially  
97 available multiplex immunoassay panels and enzyme-linked immunosorbent assays (ELISA).  
98 Specifically, GM-CSF, IFN $\gamma$ , IL-1 $\beta$ , IL-4, IL-5, IL-6, IL-7, IL-8, IL-10, IL-12(p70), IL-13, IL-  
99 17A and TNF $\alpha$  were assayed using the Millipore human high sensitivity T cell panel

100 (MPHSTCMAG28SK13); IL-15, MCP-1 and IL-9 were assayed using the Millipore Human  
101 Cytokine/Chemokine Panel I (MPHCYTOMAG60K03); HGF, FGF2 and leptin were assayed  
102 using the Millipore Human Circulating Cancer Panel 1 (MPHCCBP1MAG58K03);  
103 adiponectin was assayed using the Millipore Human Adipokine Panel 1  
104 (MPHADK1MAG61K01); C-peptide, active ghrelin, total GIP, total GLP-1, glucagon, insulin  
105 and total PYY were assayed using the Millipore Human Metabolic Hormone Panel  
106 (MPHMHEMAG34K07). Serum C-reactive protein (CRP), serotonin (5-HT) and Fibroblast  
107 Growth Factor 19 (FGF19) were quantitated using commercially available ELISA kits  
108 (MPCYT298, Merck Millipore; BA E-5900, LDN; and EHFGF19, Thermofisher Scientific,  
109 respectively). Serum glucose level was assayed using a commercially available hexokinase kit  
110 (GAHK20, Sigma Aldrich) and lipopolysaccharide (LPS) levels were quantitated using a  
111 Pierce™ LAL Chromogenic Endotoxin Quantitation Kit (Thermofisher Scientific). Serum  
112 glucose level was assayed using a commercially available hexokinase kit (GAHK20, Sigma  
113 Aldrich). For the Human Metabolic Hormone Panel, serum sample volume used for each well  
114 was doubled to 50 µL to enable better detection of the analytes. For the serotonin assay, serum  
115 was diluted (1:1000) before they were added to the sample wells. All sample were run in  
116 duplicates and all quality controls fell within the expected ranges.

117

118 **SUPPLEMENTARY INFORMATION**

119 **Table S1. Total faecal bacterial load in healthy adults following exposure to macrolides**  
 120 **for 4 weeks**

|                             | <b>Antibiotic</b> | <b>Baseline</b>                                                           | <b>ABX</b>                                                                | <b>p</b> |
|-----------------------------|-------------------|---------------------------------------------------------------------------|---------------------------------------------------------------------------|----------|
| <b>Total bacterial load</b> | Erythromycin      | 8.9 x 10 <sup>6</sup><br>(6.8 x 10 <sup>6</sup> – 1.4 x 10 <sup>7</sup> ) | 9.6 x 10 <sup>6</sup><br>(7.5 x 10 <sup>6</sup> - 1.2 x 10 <sup>7</sup> ) | 0.625    |
|                             | Azithromycin      | 1.2 x 10 <sup>7</sup><br>(5.8 x 10 <sup>6</sup> – 1.7 x 10 <sup>7</sup> ) | 9.4 x 10 <sup>6</sup><br>(6.0 x 10 <sup>6</sup> - 1.2 x 10 <sup>7</sup> ) | 0.375    |
| <b>Faecal pH</b>            | Erythromycin      | 6.7 (± 0.64)                                                              | 7.1 (± 0.48)                                                              | 0.131    |
|                             | Azithromycin      | 6.8 (± 0.27)                                                              | 7.0 (± 0.46)                                                              | 0.193    |

121 Total bacterial load of faecal samples (based on copies of 16S rRNA gene/μL) is represented  
 122 as the median and interquartile ranges. Faecal pH is represented as mean and standard  
 123 deviation. ABX refers to the 4-week duration of macrolide treatment. The p-values were  
 124 determined based on the Wilcoxon test.

125

126  
127

**Table S2. Microbial species that were significantly altered in healthy adults following exposure to erythromycin and/or azithromycin for 4 weeks.**

| Microbial species                     | Erythromycin (ERY)       |                          | Azithromycin (AZM)       |                          | Log2 fold change | p      | FDR   |
|---------------------------------------|--------------------------|--------------------------|--------------------------|--------------------------|------------------|--------|-------|
|                                       | Baseline                 | ABX                      | Baseline                 | ABX                      |                  |        |       |
| <i>Actinomyces johnsonii</i>          | 0 (0 - 0.001)            | 0.0094 (0 - 0.0203)      | 0 (0 - 0)                | 0.0363 (0.0091 - 0.0808) | 4.00             | <0.001 | 0.031 |
| <i>Actinomyces</i> sp. ICM47          | 0.0136 (0.0002 - 0.0329) | 0 (0 - 0)                | 0.0008 (0 - 0.0023)      | 0 (0 - 0)                | -2.41            | 0.01   | 0.151 |
| <i>Actinomyces</i> sp. oral taxon 170 | 0 (0 - 0)                | 0 (0 - 0.0018)           | 0 (0 - 0)                | 0.0097 (0.0057 - 0.0172) | 3.80             | 0.003  | 0.06  |
| <i>Actinomyces</i> sp. oral taxon 448 | 0 (0 - 0.0041)           | 0 (0 - 0.0018)           | 0 (0 - 0)                | 0 (0 - 0)                | 0.00             | 0.035  | 0.231 |
| <i>Bifidobacterium adolescentis</i>   | 0.4822 (0 - 5.8421)      | 0 (0 - 0)                | 1.7836 (0.068 - 8.0509)  | 0 (0 - 0)                | -12.30           | 0.002  | 0.05  |
| <i>Bifidobacterium bifidum</i>        | 0.8392 (0 - 3.7463)      | 0 (0 - 0)                | 0 (0 - 0)                | 0 (0 - 0)                | 0.00             | 0.022  | 0.207 |
| <i>Bifidobacterium longum</i>         | 2.3024 (0.4312 - 5.5853) | 0 (0 - 0)                | 1.8175 (0.3471 - 2.5887) | 0 (0 - 0)                | -13.69           | <0.001 | 0.025 |
| <i>Colinsella stercoris</i>           | 0.0043 (0.0029 - 0.0161) | 0 (0 - 0)                | 0.0065 (0.0013 - 0.0157) | 0.0005 (0 - 0.0036)      | -3.29            | 0.012  | 0.151 |
| <i>Eggerthella lenta</i>              | 0.1342 (0.03 - 0.3012)   | 0.6233 (0.1824 - 1.013)  | 0.0049 (0 - 0.0804)      | 0.1496 (0.0541 - 0.3808) | 2.08             | <0.001 | 0.025 |
| <i>Barnesiella intestinihominis</i>   | 0.3443 (0.0414 - 0.7214) | 0 (0 - 0)                | 0.1816 (0.0626 - 0.334)  | 0 (0 - 0.1179)           | -8.32            | 0.042  | 0.242 |
| <i>Odoribacter splanchnicus</i>       | 0.0838 (0.0097 - 0.0943) | 0.0138 (0 - 0.1149)      | 0.058 (0.0345 - 0.2636)  | 0 (0 - 0.0213)           | -1.08            | 0.032  | 0.231 |
| <i>Gemella sanguinis</i>              | 0 (0 - 0.0033)           | 0 (0 - 0.0178)           | 0 (0 - 0)                | 0.0045 (0 - 0.0142)      | 0.00             | 0.011  | 0.151 |
| <i>Streptococcus australis</i>        | 0 (0 - 0.0037)           | 0 (0 - 0.0134)           | 0 (0 - 0)                | 0 (0 - 0.0064)           | 0.00             | 0.018  | 0.199 |
| <i>Streptococcus mitis</i>            | 0 (0 - 0)                | 0 (0 - 0.0048)           | 0 (0 - 0)                | 0.001 (0 - 0.004)        | 0.00             | 0.021  | 0.201 |
| <i>Streptococcus salivarius</i>       | 0.2727 (0.2052 - 0.4549) | 0.127 (0.0656 - 0.1737)  | 0.1688 (0.0474 - 0.6003) | 0.1002 (0.0472 - 0.1905) | -0.97            | 0.04   | 0.242 |
| <i>Clostridium</i> sp. CAG:242        | 0 (0 - 0.0021)           | 0 (0 - 0)                | 0 (0 - 0.0642)           | 0 (0 - 0)                | 0.00             | 0.036  | 0.231 |
| <i>Eubacterium ramulus</i>            | 0.1808 (0.132 - 0.5208)  | 0.7781 (0.1109 - 1.0168) | 0.3359 (0.1856 - 0.3818) | 0.5675 (0.3952 - 1.0357) | 0.77             | 0.005  | 0.099 |
| <i>Blautia hydrogenotrophica</i>      | 0.0005 (0 - 0.0032)      | 0 (0 - 0.0078)           | 0.0118 (0 - 0.0755)      | 0.0615 (0 - 0.229)       | 0.00             | 0.038  | 0.235 |

|                                        |                                |                                |                                |                                |       |        |       |
|----------------------------------------|--------------------------------|--------------------------------|--------------------------------|--------------------------------|-------|--------|-------|
| <i>Blautia obeum</i>                   | 1.4519<br>(1.0487 -<br>2.2521) | 2.7135<br>(1.5752 -<br>5.1705) | 2.2345<br>(1.8939 -<br>3.1247) | 2.1599<br>(1.6468 -<br>3.3657) | 0.57  | 0.048  | 0.267 |
| <i>Blautia</i> sp. CAG:257             | 0 (0 - 0.0002)                 | 0 (0 -<br>0.0224)              | 0 (0 -<br>0.0007)              | 0 (0 -<br>0.0132)              | 0.00  | 0.021  | 0.201 |
| <i>Ruminococcus gnavus</i>             | 0.0062 (0 -<br>0.0617)         | 0.1439<br>(0.0055 -<br>0.9014) | 0.0131<br>(0.002 -<br>0.0402)  | 0.1073<br>(0.0071 -<br>0.2309) | 1.94  | <0.001 | 0.031 |
| <i>Coprococcus catus</i>               | 0.321 (0.1635<br>- 0.6035)     | 0.5981<br>(0.2763 -<br>0.7819) | 0.391<br>(0.1973 -<br>0.6406)  | 0.267<br>(0.1578 -<br>0.6542)  | 0.49  | 0.05   | 0.267 |
| <i>Coprococcus comes</i>               | 0.9453<br>(0.5085 -<br>2.0452) | 2.6933<br>(0.8533 -<br>4.8249) | 1.5561<br>(1.3032 -<br>2.781)  | 2.9527<br>(1.7707 -<br>3.7385) | 0.85  | <0.001 | 0.03  |
| <i>Dorea longicatena</i>               | 2.4373<br>(1.9778 -<br>3.0904) | 3.2279<br>(1.9409 -<br>7.1334) | 3.2959<br>(2.4782 -<br>4.9055) | 3.9336<br>(2.6701 -<br>4.586)  | 0.36  | 0.029  | 0.231 |
| <i>Eisenbergiella tayi</i>             | 0 (0 - 0.0009)                 | 0.0006 (0 -<br>0.0047)         | 0 (0 -<br>0.0004)              | 0 (0 -<br>0.0101)              | 0.00  | 0.029  | 0.231 |
| <i>Fusicatenibacter saccharivorans</i> | 3.4095<br>(1.6856 -<br>6.1229) | 5.5685<br>(2.2709 -<br>8.9846) | 3.3815<br>(2.1581 -<br>6.3964) | 5.9545<br>(3.2068 -<br>7.4802) | 0.39  | 0.012  | 0.151 |
| <i>Clostridium bolteae</i>             | 0 (0 - 0.0008)                 | 0 (0 -<br>0.004)               | 0 (0 -<br>0.0011)              | 0 (0 - 0)                      | 0.00  | 0.042  | 0.242 |
| <i>Roseburia inulinivorans</i>         | 0.4608<br>(0.1751 -<br>0.7264) | 0.038<br>(0.0064 -<br>0.1433)  | 0.1493<br>(0.0337 -<br>0.27)   | 0.2234<br>(0.0446 -<br>0.5062) | -0.10 | 0.457  | 0.733 |
| <i>Anaeromassilibacillus</i> sp. An250 | 0.008 (0.0017<br>- 0.0267)     | 0.0271<br>(0.0081 -<br>0.0971) | 0.007<br>(0.0005 -<br>0.0164)  | 0.0044<br>(0.0008 -<br>0.0122) | 0.77  | 0.088  | 0.304 |
| <i>Flavonifractor plautii</i>          | 0.04 (0.0128 -<br>0.095)       | 0.052<br>(0.0348 -<br>0.5552)  | 0.0583<br>(0.0107 -<br>0.0965) | 0.0803<br>(0.0407 -<br>0.1377) | 0.82  | 0.011  | 0.151 |
| <i>Ruminococcus bicirculans</i>        | 0.6329<br>(0.2281 -<br>1.1142) | 0 (0 -<br>0.2344)              | 0.3808<br>(0.1485 -<br>2.039)  | 0 (0 -<br>0.8848)              | -4.38 | 0.003  | 0.062 |
| <i>Ruminococcus callidus</i>           | 0 (0 - 0)                      | 0 (0 - 0)                      | 0 (0 -<br>0.0263)              | 0 (0 - 0)                      | 0.00  | 0.036  | 0.231 |
| <i>Clostridium innocuum</i>            | 0.0018<br>(0 - 0.0115)         | 0.0052<br>(0.0001 -<br>0.0387) | 0.0035 (0 -<br>0.0098)         | 0.0019 (0 -<br>0.0112)         | 0.17  | 0.033  | 0.231 |
| <i>Clostridium spiroforme</i>          | 0.0534<br>(0.0207 -<br>0.1253) | 0.125<br>(0.0153 -<br>0.5476)  | 0.0181<br>(0.0068 -<br>0.0774) | 0.0921<br>(0.0191 -<br>0.3824) | 0.87  | 0.012  | 0.151 |
| <i>Turicibacter sanguinis</i>          | 0.0005<br>(0 - 0.0109)         | 0 (0 - 0)                      | 0 (0 -<br>0.0395)              | 0 (0 - 0)                      | 0.00  | 0.019  | 0.201 |
| <i>Firmicutes bacterium</i> CAG:110    | 0.0048<br>(0 - 0.4866)         | 0 (0 -<br>0.0011)              | 0.1175<br>(0.0124 -<br>0.3326) | 0 (0 -<br>0.0281)              | -2.54 | 0.025  | 0.224 |
| <i>Veillonella atypica</i>             | 0 (0 - 0.017)                  | 0 (0 - 0)                      | 0 (0 - 0)                      | 0 (0 - 0)                      | 0.00  | 0.036  | 0.231 |
| <i>Veillonella dispar</i>              | 0<br>(0 - 0.0082)              | 0 (0 - 0)                      | 0 (0 - 0)                      | 0 (0 - 0)                      | 0.00  | 0.035  | 0.231 |
| <i>Veillonella parvula</i>             | 0<br>(0 - 0.0461)              | 0 (0 - 0)                      | 0 (0 -<br>0.0046)              | 0 (0 - 0)                      | 0.00  | 0.014  | 0.168 |



|                         |                        |           |                            |           |       |       |       |
|-------------------------|------------------------|-----------|----------------------------|-----------|-------|-------|-------|
| Bilophila wadsworthia   | 0.0126<br>(0 - 0.0448) | 0 (0 - 0) | 0.0342<br>(0.0093 - 0.037) | 0 (0 - 0) | -6.89 | 0.001 | 0.039 |
| Akkermansia muciniphila | 0.0542<br>(0 - 0.3363) | 0 (0 - 0) | 0.1716 (0 - 0.6631)        | 0 (0 - 0) | -7.99 | 0.003 | 0.06  |

128 \*Log2 fold change, p-values and FDR-adjusted p-values are based on the combined changes  
129 for the erythromycin and azithromycin groups. Microbial species abundances are indicated as  
130 median and interquartile ranges.

131

132  
133

**Table S3. Microbial pathways that were significantly altered in healthy adults following exposure to erythromycin and/or azithromycin for 4 weeks.**

| Microbial pathways                                                 | Erythromycin (ERY)         |                              | Azithromycin (AZM)         |                             | Log2FC | p      | FDR p  |
|--------------------------------------------------------------------|----------------------------|------------------------------|----------------------------|-----------------------------|--------|--------|--------|
|                                                                    | Baseline                   | ABX                          | Baseline                   | ABX                         |        |        |        |
| ANAEROFRUCAT-PWY:homolactic fermentation                           | 5837.2<br>(4966.7, 6803.6) | 4432.5<br>(3741.6, 4866.3)   | 5558.7<br>(4891.1, 6187.9) | 3120.5<br>(2930, 3870.5)    | -0.08  | <0.001 | 0.001  |
| COA-PWY:coenzyme A biosynthesis I (prokaryotic)                    | 9569.1<br>(7999.6, 9895.7) | 10457.9<br>(9529.4, 10822.8) | 10145.5<br>(9534, 10416.6) | 10441.8<br>(10331, 10873.4) | 0.26   | <0.001 | 0.003  |
| FERMENTATION-PWY:mixed acid fermentation                           | 2540.1<br>(1310.4, 3269.3) | 765.1<br>(303.3, 1040.9)     | 2245<br>(1339.5, 2657.2)   | 450<br>(228.6, 520.8)       | 0      | <0.001 | <0.001 |
| GLUCONEO-PWY:gluconeogenesis I                                     | 3669.1<br>(3101.6, 4538.4) | 3069.8<br>(2358.1, 3403.9)   | 3947.7<br>(3436.6, 4366.2) | 2186.9<br>(1921.6, 2687.1)  | -4.59  | <0.001 | 0.003  |
| GLUCOSE1PMETAB-PWY:glucose and glucose-1-phosphate degradation     | 1290<br>(335.5, 2434.7)    | 0<br>(0, 41.7)               | 310.3<br>(127.4, 602.7)    | 0<br>(0, 25.3)              | 0      | <0.001 | <0.001 |
| GLYCOCAT-PWY:glycogen degradation I                                | 2418<br>(658.9, 3856.5)    | 0<br>(0, 83.2)               | 612.4<br>(252.7, 1168.6)   | 0<br>(0, 50.6)              | 0.28   | <0.001 | <0.001 |
| GLYCOLYSIS:glycolysis I (from glucose-6-phosphate)                 | 4947.4<br>(3260.5, 5631.8) | 2668<br>(2429.6, 3074.4)     | 3710.5<br>(3383.1, 5144.6) | 1690.1<br>(1498.2, 2401.2)  | 0      | <0.001 | 0.002  |
| P124-PWY:Bifidobacterium shunt                                     | 879.1<br>(434.2, 2425.6)   | 0<br>(0, 67.1)               | 1513.4<br>(988.5, 1649.1)  | 0 (0, 0)                    | 0.06   | <0.001 | 0.002  |
| PWY-241:C4 photosynthetic carbon assimilation-cycle (NADP-ME type) | 2204.2<br>(1082.4, 3350.1) | 475.6<br>(198, 787.2)        | 1718.3<br>(894.6, 2324.4)  | 301.5<br>(102.7, 352.7)     | -4.6   | <0.001 | <0.001 |
| PWY-2723:trehalose degradation V                                   | 1314.1<br>(338.1, 2237.1)  | 0<br>(0, 41.7)               | 311.7<br>(127.7, 601.1)    | 0<br>(0, 25.4)              | 0.23   | <0.001 | <0.001 |
| PWY-5384:sucrose degradation IV (sucrose-phosphorylase)            | 1426.4<br>(512.4, 2499.6)  | 141.3<br>(98, 194.6)         | 949.7<br>(560.8, 1625.6)   | 57.3<br>(46.5, 102.8)       | 0      | <0.001 | <0.001 |
| PWY-5484:glycolysis II (from fructose-6-phosphate)                 | 4397.4<br>(3032.5, 4907.3) | 2371.7<br>(2127.2, 2598.2)   | 3406.3<br>(2726.6, 4432.5) | 1540.5<br>(1336.8, 1965.6)  | -0.56  | <0.001 | 0.001  |
| PWY-5913:partial TCA cycle (obligate autotrophs)                   | 2412.8<br>(930.4, 3262)    | 415.2<br>(161, 686.8)        | 1494.6<br>(802.5, 2478.1)  | 253.1<br>(83.5, 292)        | -1.44  | <0.001 | <0.001 |
| PWY-622:starch biosynthesis                                        | 1132.1<br>(315.2, 3507.4)  | 0 (0, 0)                     | 542.3<br>(180.8, 864.2)    | 0 (0, 0)                    | -0.41  | <0.001 | 0.002  |
| PWY-6527:stachyose degradation                                     | 6915.3<br>(6284.1, 7563.4) | 8080.1<br>(7430.4, 9409.3)   | 7393.9<br>(6772.3, 8105.5) | 9807.1<br>(9174.5, 10075.8) | -0.11  | <0.001 | 0.002  |
| PWY-6549:L-glutamine biosynthesis III                              | 1993.6<br>(1297.2, 2164.8) | 1018<br>(408.4, 1278.6)      | 1973.5<br>(1543.4, 2137.2) | 567.5<br>(264.8, 646)       | 0      | <0.001 | 0.001  |
| PWY-6731:starch degradation III                                    | 1353.9<br>(411.7, 2161.6)  | 0 (0, 52)                    | 372.1<br>(156.1, 709.3)    | 0<br>(0, 31.6)              | 0.12   | <0.001 | <0.001 |

|                                                                                     |                               |                               |                               |                               |       |            |            |
|-------------------------------------------------------------------------------------|-------------------------------|-------------------------------|-------------------------------|-------------------------------|-------|------------|------------|
| PWY-7117:C4 photosynthetic carbon assimilation cycle (PEPCK type)                   | 2502.6<br>(1198.8, 3316.1)    | 531.6<br>(231.3, 779.1)       | 1677.4<br>(949.5, 2586)       | 342.7<br>(120.7, 399.1)       | 0     | <0.00<br>1 | <0.00<br>1 |
| PWY-7198:pyrimidine deoxyribonucleotides de novo biosynthesis IV                    | 1523<br>(1107.6, 1812.3)      | 786<br>(649.1, 1175.6)        | 1616.9<br>(1236.2, 1987)      | 345.4<br>(222.1, 562.2)       | 0.14  | <0.00<br>1 | <0.00<br>1 |
| PWY-7234:inosine-5'-phosphate biosynthesis III                                      | 3090.8<br>(1790.8, 3722.5)    | 1218.8<br>(476.5, 1793.8)     | 2399.6<br>(1081.4, 2916.2)    | 731.2<br>(459.7, 1081.7)      | 0.28  | <0.00<br>1 | 0.001      |
| PWY-7237:myo-, chiro- and scyllo-inositol degradation                               | 6053.1<br>(5522.4, 6458.8)    | 7543.5<br>(6468.7, 7814.1)    | 6350.3<br>(5987.1, 7667.6)    | 9082.4<br>(8046, 9985.5)      | -0.01 | 0.001      | 0.004      |
| PWY-7328:superpathway of UDP-glucose-derived O-antigen building blocks biosynthesis | 1420.6<br>(400.2, 2245.5)     | 19.5<br>(0, 64.7)             | 376.4<br>(157.2, 711.3)       | 0<br>(0, 31.3)                | 0     | <0.00<br>1 | <0.00<br>1 |
| PWY-7357:thiamine phosphate formation from pyriothiamine and oxythiamine            | 7655<br>(6537.4, 8239)        | 8932.6<br>(7745, 9668.5)      | 8544.6<br>(7672.2, 8986.5)    | 10018.7<br>(9756.6, 10358.5)  | 0     | <0.00<br>1 | 0.001      |
| UDPNAGSYN-PWY:UDP-N-acetyl-D-glucosamine biosynthesis I                             | 5213.9<br>(4351, 5936.8)      | 3288<br>(2789.3, 4198.4)      | 6046.2<br>(4754.9, 6583.7)    | 3465.2<br>(2917.6, 4055.7)    | 0     | <0.00<br>1 | 0.003      |
| 1CMET2-PWY:folate transformations III (E. coli)                                     | 8726.6<br>(8300.5, 9727.9)    | 9870.1<br>(9222.5, 10162.4)   | 9474.7<br>(9195, 9783.1)      | 10300.7<br>(9763.5, 10968.6)  | 0     | <0.00<br>1 | 0.002      |
| HEXITOLDEGSUPER-PWY:superpathway of hexitol degradation (bacteria)                  | 2314.7<br>(1947.1, 2680.1)    | 1801.8<br>(1530.5, 2238.6)    | 1935.8<br>(1596.8, 2357.5)    | 1417.2<br>(1033.4, 1546)      | -0.21 | 0.003      | 0.012      |
| PANTO-PWY:phosphopantothenate biosynthesis I                                        | 6776.6<br>(5772.7, 7882.8)    | 8033.9<br>(7813.8, 8659.4)    | 7151.1<br>(6474.2, 7662.2)    | 8812<br>(8396.3, 9466.1)      | 0.24  | <0.00<br>1 | 0.001      |
| PANTOSYN-PWY:superpathway of coenzyme A biosynthesis I (bacteria)                   | 7498.6<br>(6053.7, 8474.7)    | 8627<br>(8501.9, 9154.6)      | 7905<br>(7573.8, 8517.5)      | 9300.1<br>(9076.2, 9993.3)    | -0.88 | <0.00<br>1 | 0.001      |
| PWY-1042:glycolysis IV                                                              | 12830.8<br>(11800.9, 13661.8) | 14774.5<br>(13796.8, 15556.4) | 13392.3<br>(12527.3, 13750.1) | 14910.2<br>(14445.8, 15828.8) | -0.03 | <0.00<br>1 | <0.00<br>1 |
| PWY-4041:gamma;-glutamyl cycle                                                      | 2440.1<br>(1828.3, 2667.1)    | 1327.1<br>(1134.9, 1566.3)    | 2077.1<br>(1849.8, 2462.4)    | 1212.5<br>(1010.7, 1422.4)    | 0.11  | <0.00<br>1 | 0.001      |
| PWY-5667:CDP-diacylglycerol biosynthesis I                                          | 9712.5<br>(8687, 10328.5)     | 10846.9<br>(10014.7, 11377.8) | 10332.7<br>(9764.5, 10501)    | 11063.6<br>(10850.6, 11468.2) | 0     | <0.00<br>1 | 0.001      |
| PWY-5690:TCA cycle II (plants and fungi)                                            | 1436.7<br>(1031.4, 1958.2)    | 924.5<br>(497.9, 1048.2)      | 999.8<br>(858.6, 1323.2)      | 498.3<br>(352.3, 715.5)       | 0     | <0.00<br>1 | 0.001      |
| PWY-6168:flavin biosynthesis III (fungi)                                            | 7106<br>(6047.6, 7854.8)      | 8382.5<br>(7545.7, 8817.9)    | 7628.7<br>(6745.9, 7866.4)    | 9334.5<br>(8934.8, 9591)      | 0     | <0.00<br>1 | 0.001      |
| PWY-6317:D-galactose degradation I (Leloir pathway)                                 | 6970.7<br>(6141.8, 7681.7)    | 8554.7<br>(7890.8, 8804.9)    | 7519.3<br>(6929.4, 7791.8)    | 9340.4<br>(9241.5, 9606.4)    | 0     | <0.00<br>1 | <0.00<br>1 |

|                                                                                  |                              |                               |                               |                               |       |            |            |
|----------------------------------------------------------------------------------|------------------------------|-------------------------------|-------------------------------|-------------------------------|-------|------------|------------|
| PWY-6901:superpathway of glucose and xylose degradation                          | 2869.6<br>(2407.8, 3550.2)   | 1461.7<br>(1351.6, 1596)      | 2332.9<br>(1972.4, 2997)      | 1180.1<br>(958.6, 1495.7)     | 0.17  | <0.00<br>1 | <0.00<br>1 |
| PWY0-1296:purine ribonucleosides degradation                                     | 9219.3<br>(7985.3, 9856.4)   | 11383.2<br>(10329.4, 12197.9) | 10289<br>(9194.9, 10769)      | 11753.4<br>(11515.6, 12477.8) | 0.35  | <0.00<br>1 | 0.001      |
| PWY0-1319:CDP-diacylglycerol biosynthesis II                                     | 9712.5<br>(8687, 10328.5)    | 10846.9<br>(10014.7, 11377.8) | 10332.7<br>(9764.5, 10501)    | 11063.6<br>(10850.6, 11468.2) | 0     | <0.00<br>1 | 0.001      |
| PWY66-399:gluconeogenesis III                                                    | 1779.1<br>(1311.5, 2051.2)   | 1329<br>(1097.7, 1844.5)      | 1836.5<br>(1699.8, 2225.7)    | 1178.5<br>(864.9, 1309.5)     | 0.18  | 0.001      | 0.004      |
| PWY66-422                                                                        | 6970.7<br>(6141.8, 7681.7)   | 8348.3<br>(7682.5, 8804.2)    | 7519.3<br>(6929.4, 7791.8)    | 9340.4<br>(9241.5, 9606.4)    | -2.18 | <0.00<br>1 | 0.001      |
| PYRIDNUCSYN-PWY:NAD de novo biosynthesis I (from aspartate)                      | 6875.8<br>(5762.8, 7136.1)   | 7289.8<br>(6957, 7860.6)      | 6494.1<br>(5447.8, 7252.4)    | 7395.2<br>(7151, 7735.3)      | -0.44 | <0.00<br>1 | 0.001      |
| TCA:TCA cycle I (prokaryotic)                                                    | 1982.1<br>(1429.3, 2501)     | 1272<br>(652.2, 1457.5)       | 1325.3<br>(1227, 1701.2)      | 730.7<br>(517.7, 1034.9)      | 0.13  | <0.00<br>1 | 0.001      |
| FASYN-INITIAL-PWY:superpathway of fatty acid biosynthesis initiation (E. coli)   | 8773.1<br>(7956.3, 9385.6)   | 10353.5<br>(8914.3, 10532.2)  | 9175.7<br>(7823.7, 9593.5)    | 10041.3<br>(9999.2, 10215.3)  | -2.23 | <0.00<br>1 | 0.003      |
| GLYCOLYSIS-E-D:superpathway of glycolysis and the Entner-Doudoroff pathway       | 1968.5<br>(1351, 2157.8)     | 1241.1<br>(1068.9, 1354.4)    | 1525.9<br>(1445, 1886.4)      | 780.9<br>(429.2, 974.6)       | 0     | <0.00<br>1 | 0.001      |
| OANTIGEN-PWY:O-antigen building blocks biosynthesis (E. coli)                    | 6481.7<br>(5724.3, 7226.3)   | 5064.5<br>(4444.2, 5648.7)    | 7249.4<br>(6488, 7827.3)      | 5197.5<br>(4581.3, 5882.2)    | 0     | 0.002      | 0.007      |
| PWY-6151:S-adenosyl-L-methionine salvage I                                       | 10984.4<br>(9653.9, 11212.1) | 11503.6<br>(10983.1, 11800.8) | 11676.5<br>(10969.8, 11830.3) | 12070.2<br>(11757.5, 12785)   | 0.15  | 0.001      | 0.004      |
| PWY0-1479:tRNA processing                                                        | 1864.3<br>(1716, 2166.1)     | 875.5<br>(702.3, 1387.9)      | 1283.7<br>(1077.3, 1579.5)    | 618.9<br>(505.9, 715.6)       | 0     | <0.00<br>1 | <0.00<br>1 |
| RIBOSYN2-PWY:flavin biosynthesis I (bacteria and plants)                         | 7603.7<br>(6417, 8457.4)     | 8828.3<br>(7991.3, 9269.6)    | 8000.3<br>(7166.7, 8338.6)    | 9731.7<br>(9308.1, 9970.2)    | 0.06  | <0.00<br>1 | 0.002      |
| THISYNARA-PWY:superpathway of thiamine diphosphate biosynthesis III (eukaryotes) | 4973.9<br>(4579, 5346.3)     | 5736.2<br>(4670.2, 6907.4)    | 4830.5<br>(4422.6, 6097.2)    | 6985.5<br>(5900.5, 7707.6)    | 0     | 0.001      | 0.004      |
| TRPSYN-PWY:L-tryptophan-biosynthesis                                             | 7014.1<br>(6434.3, 7457.6)   | 7622.7<br>(6329.2, 8887.8)    | 7627.1<br>(6674.6, 8143.2)    | 8878.7<br>(8495.7, 9794.9)    | 0     | 0.002      | 0.007      |
| COMPLETE-ARO-PWY:superpathway of aromatic amino acid biosynthesis                | 11464<br>(10514.1, 11683.8)  | 12087<br>(11411.9, 12573.3)   | 12014.6<br>(11579, 12739.6)   | 12993<br>(12542.5, 13406)     | 0     | <0.00<br>1 | 0.002      |
| P4-PWY:superpathway of L-lysine, L-threonine and L-methionine biosynthesis I     | 2531.6<br>(1390, 3764.2)     | 652.9<br>(403.5, 1397.2)      | 1909<br>(1441.7, 3087.3)      | 694.7<br>(597.9, 923.6)       | -0.63 | <0.00<br>1 | 0.002      |

|                                                                                    |                                  |                                  |                                  |                                      |       |            |       |
|------------------------------------------------------------------------------------|----------------------------------|----------------------------------|----------------------------------|--------------------------------------|-------|------------|-------|
| PWY-4242                                                                           | 10020.8<br>(8225.5,<br>10273.1)  | 10994.9<br>(9884.7,<br>11338.2)  | 10503.5<br>(9939.7,<br>10910.5)  | 10947<br>(10655.3<br>,<br>11399.9)   | 0     | 0.001      | 0.004 |
| PWY0-781:aspartate<br>superpathway                                                 | 2372.3<br>(1455.9,<br>3395.6)    | 688.5<br>(427.7,<br>1453.7)      | 1995.2<br>(1514.6,<br>2825)      | 735<br>(630.4,<br>975.9)             | -0.41 | <0.00<br>1 | 0.002 |
| CALVIN-PWY:Calvin<br>Benson Bassham cycle                                          | 9576.8<br>(8589.4,<br>10552.1)   | 10971.7<br>(10559.4,<br>11512.9) | 10441.8<br>(9854.9,<br>10879.4)  | 11694.9<br>(11480.4<br>,<br>12068.4) | 0     | <0.00<br>1 | 0.001 |
| COBALSYN-<br>PWY:superpathway of<br>adenosylcobalamin salvage<br>from cobinamide I | 5094.8<br>(4341.2,<br>5710.5)    | 6172.7<br>(5381.3,<br>6996)      | 5750.2<br>(5226.5,<br>6181.4)    | 7313.7<br>(6491.2,<br>7576.5)        | -0.18 | <0.00<br>1 | 0.002 |
| PWY-6163:chorismate<br>biosynthesis from 3-<br>dehydroquinate                      | 12413.4<br>(11405.7,<br>12840.9) | 13610.9<br>(13078.5,<br>14209.9) | 12867.9<br>(12489.7,<br>14100.2) | 14228.7<br>(13802.3<br>,<br>14805.3) | 0     | <0.00<br>1 | 0.002 |
| PWY-6969:TCA cycle V<br>(2-oxoglutarate-synthase)                                  | 1227.1<br>(1033.9,<br>1647.6)    | 1016.5<br>(723.9,<br>1235)       | 872.8<br>(670.4,<br>1403.1)      | 432.5<br>(282.4,<br>810)             | 0.29  | 0.002      | 0.007 |
| PWY-7388:octanoyl-[acyl-<br>carrier protein] biosynthesis<br>(mitochondria, yeast) | 1902.2<br>(1077.7,<br>3188.4)    | 351<br>(153.3,<br>958.7)         | 1755.4<br>(508.9,<br>2244.6)     | 339.3<br>(133.9,<br>761.8)           | -0.06 | <0.00<br>1 | 0.003 |
| PWY-7209:superpathway<br>of pyrimidine<br>ribonucleosides degradation              | 537.2<br>(106.9,<br>861.5)       | 0 (0, 0)                         | 441.4<br>(68.5,<br>724.1)        | 0 (0, 0)                             | 0.06  | <0.00<br>1 | 0.002 |
| ARO-PWY:chorismate<br>biosynthesis I                                               | 12228.8<br>(11277.1,<br>12534.7) | 13276.3<br>(12691.1,<br>13610.1) | 12726.2<br>(12412.2,<br>13578.8) | 13672.5<br>(13413,<br>14293)         | 0.24  | 0.001      | 0.004 |
| NONOXIPENT-<br>PWY:pentose phosphate<br>pathway (non-oxidative<br>branch) I        | 7788.3<br>(7061.3,<br>8649.8)    | 8863.2<br>(8424.3,<br>10225.1)   | 7846.8<br>(7590.7,<br>8955.2)    | 9740.3<br>(8760.7,<br>9997.3)        | -0.47 | 0.001      | 0.004 |
| PWY-6282 (palmitoleate-<br>biosynthesis-I (from (5Z<br>dodec-5-enoate-             | 962<br>(844.3,<br>2222.1)        | 318.3<br>(150.8,<br>789.7)       | 1197.6<br>(433.3,<br>1612.5)     | 269.8<br>(153.9,<br>648)             | -0.78 | 0.001      | 0.004 |
| PWY-5918:superpathway<br>of heme b biosynthesis from<br>glutamate                  | 106.9 (58,<br>452.4)             | 75.4 (47,<br>134.1)              | 89 (56.4,<br>147.5)              | 0<br>(0, 33.8)                       | -0.92 | 0.021      | 0.065 |
| PWY-7210:pyrimidine<br>deoxyribonucleotides<br>biosynthesis from CTP               | 833.6<br>(235.8,<br>984)         | 326<br>(95, 712)                 | 30.5<br>(0, 41.7)                | 176.7<br>(12.3,<br>428)              | -0.1  | 0.737      | 0.788 |
| PWY0-<br>1261:anhydromuropeptides<br>recycling I                                   | 3826.3<br>(2353,<br>4137.7)      | 2661.3<br>(1695.4,<br>3205.2)    | 2640.8<br>(2044.1,<br>3241.6)    | 1483.7<br>(805.5,<br>2044.8)         | 0     | 0.001      | 0.004 |
| BIOTIN-BIOSYNTHESIS-<br>PWY:biotin biosynthesis I                                  | 1182.2<br>(998.2,<br>2105.5)     | 412.9<br>(220.9,<br>1001.7)      | 1472.1<br>(513.5,<br>1796.6)     | 383.5<br>(209.5,<br>808.8)           | 0.06  | 0.001      | 0.004 |
| GLYCOGENSYNTH-<br>PWY:glycogen biosynthesis<br>I (from ADP-D-Glucose)              | 9110.7<br>(8832.3,<br>10362.2)   | 10956.6<br>(10008.3,<br>12489.4) | 10376.9<br>(9824.5,<br>10604.6)  | 12436.2<br>(10967.2<br>,<br>12982.1) | 0     | 0.001      | 0.004 |
| HSERMETANA-PWY:L-<br>methionine biosynthesis III                                   | 6622.2<br>(6094.7,<br>7655.6)    | 8381.1<br>(6922.5,<br>9372.2)    | 7346.2<br>(7223.9,<br>7724.5)    | 8213.8<br>(7771.1,<br>8794.2)        | 0.03  | 0.002      | 0.008 |

|                                                                         |                               |                             |                               |                               |       |        |       |
|-------------------------------------------------------------------------|-------------------------------|-----------------------------|-------------------------------|-------------------------------|-------|--------|-------|
| NONMEVIPP-PWY:methylerythritol phosphate pathway I                      | 11234.6<br>(10873.2, 11560.2) | 11955.9<br>(11428, 12202.7) | 11751.6<br>(11651.5, 12034.8) | 12230.4<br>(11750.7, 12896.1) | 0.24  | 0.005  | 0.018 |
| P42-PWY:incomplete reductive TCA cycle                                  | 482.2<br>(401.3, 763.5)       | 395.1<br>(283.6, 911)       | 475.3<br>(292.6, 886.2)       | 219.1<br>(154.9, 420.2)       | -0.39 | 0.04   | 0.103 |
| P441-PWY:superpathway of N-acetylneuraminate degradation                | 1959.7<br>(1779.5, 2147.3)    | 1542.9<br>(1343, 1872.4)    | 1600.6<br>(1002.9, 1779.7)    | 1082.3<br>(865.5, 1279.6)     | 0.32  | 0.008  | 0.03  |
| PENTOSE-P-PWY:pentose phosphate pathway                                 | 2914.4<br>(2117.1, 3267.8)    | 1578.5<br>(872.7, 1699.3)   | 1768.5<br>(1391.7, 2509.9)    | 1182.9<br>(685.9, 1362.8)     | 0.03  | <0.001 | 0.003 |
| PWY-5100:pyruvate fermentation to acetate and lactate II                | 6551<br>(5820.6, 7250.6)      | 8154.7<br>(7475.3, 9494.4)  | 7745.8<br>(6972.3, 8329)      | 8418.5<br>(8117.9, 9263.2)    | 0     | <0.001 | 0.002 |
| PWY-6270:isoprene biosynthesis I                                        | 7917.2<br>(7523.6, 8366)      | 8982.1<br>(8390.9, 9724.8)  | 8154.4<br>(7879.9, 8320.2)    | 9278.3<br>(8384.4, 9714.1)    | 0.06  | <0.001 | 0.003 |
| PWY-6737 :starch degradation V                                          | 14334.5<br>(13540.4, 15454.6) | 15797<br>(14855.6, 16692.5) | 14555.3<br>(14063.5, 15222.9) | 15862.8<br>(15541.6, 16550.4) | 0     | <0.001 | 0.001 |
| PWY-6897:thiamine-diphosphate-salvage-II                                | 5175.2<br>(4435.9, 5659.6)    | 5773.9<br>(5021.7, 7067.7)  | 5165.9<br>(4693.3, 6341.4)    | 6630.9<br>(5915.3, 7705.2)    | -0.9  | 0.002  | 0.008 |
| PWY-7560:methylerythritol phosphate pathway II                          | 7759.1<br>(7432.2, 8239)      | 9051.9<br>(8298, 9641.1)    | 8015.1<br>(7733.4, 8140.2)    | 9295.1<br>(8388, 9660.1)      | 0     | <0.001 | 0.003 |
| PWY-7664:oleate biosynthesis IV (anaerobic)                             | 1084.3<br>(943.8, 2429.5)     | 328.5<br>(137.3, 861.7)     | 1334.5<br>(442.2, 1793.6)     | 308.1<br>(129.3, 692.7)       | 0     | 0.001  | 0.004 |
| PWY0-862:(5Z)-dodecenoate biosynthesis I                                | 995.8<br>(871.5, 2352.5)      | 289 (119, 774.2)            | 1265.2<br>(397.7, 1688.2)     | 273.5<br>(112.3, 617.6)       | 0     | 0.001  | 0.004 |
| PWY-5083:NAD(P)/NADPH interconversion                                   | 26.1 (0, 80)                  | 12.6 (0, 95)                | 23.7 (0, 89.3)                | 0 (0, 0)                      | 0     | 0.052  | 0.117 |
| PWY0-1415:superpathway of heme b biosynthesis from uroporphyrinogen-III | 46.3 (31.3, 252.3)            | 19.3 (0, 78.3)              | 33.5 (0, 74.4)                | 0 (0, 0)                      | -0.78 | 0.036  | 0.096 |
| DAPLYSINESYN-PWY:L-lysine biosynthesis I                                | 3331.7<br>(2379.9, 4439.4)    | 1193.3<br>(840.2, 2085.2)   | 2684.1<br>(1704.1, 3978.2)    | 1020.7<br>(725.3, 2166.1)     | 0     | 0.001  | 0.003 |
| FASYN-ELONG-PWY:fatty acid elongation                                   | 1163.3<br>(991, 2492.8)       | 366<br>(155.2, 941.7)       | 1395.8<br>(483.6, 1864)       | 340.5<br>(145.9, 762.1)       | 0.19  | 0.001  | 0.004 |
| PWY-5005:biotin biosynthesis II                                         | 282.1<br>(157.4, 579.5)       | 329.8<br>(126.1, 649.4)     | 320.3<br>(222.9, 742)         | 361.6<br>(96.5, 556.1)        | -0.25 | 0.344  | 0.434 |
| PWY-6519:8-amino-7-oxononanoate biosynthesis I                          | 996.9<br>(878.6, 2017.7)      | 335<br>(176.4, 855.9)       | 1313.5<br>(422.3, 1583.2)     | 312.3<br>(166.7, 679.2)       | 0.36  | 0.001  | 0.004 |
| GALACTARDEG-PWY:D-galactarate degradation I                             | 90.2 (16.1, 239.3)            | 84.1 (42.2, 103.7)          | 146.2 (14.5, 201)             | 30.8 (2.9, 108.1)             | -0.32 | 0.107  | 0.177 |
| GLUCARDEG-PWY:D-glucarate degradation I                                 | 81.7 (9.7, 103.7)             | 76.5 (21.1, 97.7)           | 75.1 (4.6, 126.3)             | 12.6 (0, 30.5)                | -0.21 | 0.151  | 0.225 |

|                                                                                              |                            |                           |                            |                            |       |        |       |
|----------------------------------------------------------------------------------------------|----------------------------|---------------------------|----------------------------|----------------------------|-------|--------|-------|
| GLUCARGALACTSUPER-PWY:superpathway of D-glucarate and D-galactarate degradation              | 90.2 (16.1, 239.3)         | 84.1 (42.2, 103.7)        | 146.2 (14.5, 201)          | 30.8 (2.9, 108.1)          | -0.61 | 0.107  | 0.177 |
| PWY-5173                                                                                     | 105.5 (54.5, 665.4)        | 30.7 (15.8, 56.9)         | 41.1 (10.2, 112.5)         | 15.9 (0, 37)               | 0     | 0.012  | 0.04  |
| PWY-5464:superpathway of cytosolic glycolysis (plants), pyruvate dehydrogenase and TCA cycle | 172.4 (37.3, 263.2)        | 97.5 (64.8, 165.1)        | 101.4 (32.2, 190.5)        | 28.3 (0, 72)               | -0.9  | 0.139  | 0.214 |
| ASPASN-PWY:superpathway of L-aspartate and L-asparagine biosynthesis                         | 3576 (3469, 3932.7)        | 4442.8 (4145.9, 4671.3)   | 3532.5 (3376.8, 3825.9)    | 4491.4 (3926.2, 4968.1)    | 0     | 0.001  | 0.004 |
| DTDPRHAMSYN-PWY:dTDP-&beta;-L-rhamnose biosynthesis                                          | 11317.9 (10391.1, 11911.9) | 13171 (12797.5, 13704.7)  | 11148.3 (10650.6, 12586.9) | 12426.7 (12059.1, 13008.2) | 0     | <0.001 | 0.003 |
| GLUTORN-PWY:L-ornithine biosynthesis I                                                       | 9112.3 (8393.7, 10268.2)   | 10027.8 (9118.8, 10409.7) | 10485.8 (9375.6, 10841.7)  | 10901.2 (10771.2, 11053.8) | -5.19 | 0.012  | 0.041 |
| X-GOLPDLCAT-PWY:superpathway of glycerol degradation to 1,3-propanediol                      | 804.1 (768, 853)           | 1260.5 (1063.6, 1405.7)   | 678.3 (617.9, 808.4)       | 1206 (736.9, 1371.8)       | 0     | 0.002  | 0.009 |
| PWY0-1241:ADP-L-glycero-&beta;-D-mannoheptose biosynthesis                                   | 378.8 (266.5, 867.3)       | 230.6 (179.2, 319.2)      | 220.1 (143.1, 456.2)       | 98.2 (2.2, 133.9)          | -0.48 | 0.001  | 0.004 |
| PYRIDNUCSAL-PWY:NAD salvage pathway I (PNC VI cycle)                                         | 1885.1 (514.2, 3394.8)     | 354 (89.2, 851.4)         | 1429.6 (343.1, 3043.4)     | 188.8 (114, 435)           | 0.17  | 0.002  | 0.007 |
| PWY-7254:TCA cycle VII (acetate-producers)                                                   | 90.5 (8.5, 824.3)          | 0 (0, 23.3)               | 8.3 (0, 162.2)             | 0 (0, 0)                   | 0     | 0.003  | 0.013 |
| P164-PWY:purine nucleobases degradation I (anaerobic)                                        | 1625.6 (1310.4, 1929.8)    | 2001.4 (1762.2, 2472)     | 1946.8 (1636.2, 2087.9)    | 2643 (2089.2, 2859.5)      | 0.04  | <0.001 | 0.003 |
| PWY-6284:superpathway of unsaturated fatty acids biosynthesis (E. coli)                      | 489.9 (386.7, 823)         | 288.5 (135.3, 369)        | 531.8 (370.9, 742.8)       | 183.2 (76.5, 456.8)        | 0     | 0.001  | 0.004 |
| HEME-BIOSYNTHESIS-II:heme b biosynthesis I (aerobic)                                         | 113.2 (40.7, 452.7)        | 46.1 (26.4, 121.1)        | 78.1 (40.1, 94)            | 8.5 (0, 38.7)              | -0.65 | 0.003  | 0.01  |
| METH-ACETATE-PWY:methanogenesis from acetate                                                 | 2629.2 (2095, 2854.6)      | 3446 (2865.5, 4015.7)     | 2739.7 (2105.6, 3245.5)    | 3834 (2991, 4285.1)        | 0     | 0.001  | 0.004 |
| PWY-5121:superpathway of geranylgeranyl diphosphate biosynthesis II (via MEP)                | 2135.4 (1809.1, 3264.6)    | 1544.8 (922, 2668.9)      | 2347.7 (2023.7, 2656)      | 1746.9 (1108.3, 2530.6)    | 0     | <0.001 | 0.003 |
| PWY-7115:C4 photosynthetic carbon assimilation cycle, NAD-ME type                            | 1533.8 (1263, 2125.7)      | 942.4 (783.7, 1060.7)     | 1234.5 (1022.8, 2013.6)    | 898.1 (698.5, 962.9)       | -2.44 | 0.001  | 0.004 |
| REDCITCYC:TCA cycle VI (Helicobacter)                                                        | 89.9 (38.5, 194)           | 0 (0, 53.2)               | 35.4 (4.6, 168.1)          | 19.9 (0, 36.7)             | 0.03  | 0.005  | 0.019 |

|                                                                                |                               |                               |                               |                               |       |       |       |
|--------------------------------------------------------------------------------|-------------------------------|-------------------------------|-------------------------------|-------------------------------|-------|-------|-------|
| PWY-6121:5-aminoimidazole ribonucleotide biosynthesis I                        | 10078<br>(9633.7, 10326.6)    | 10764.1<br>(10175.7, 11801.4) | 11036.2<br>(10499.2, 11470.6) | 11471.9<br>(11196.6, 11721.4) | 0.06  | 0.008 | 0.03  |
| PWY-6609:adenine and adenosine salvage III                                     | 11502.7<br>(9670.9, 12019.8)  | 13118.7<br>(12497.3, 14188.5) | 12285.4<br>(11739.7, 13139.1) | 13107.1<br>(12667.8, 13540.2) | 0     | 0.001 | 0.003 |
| PWY-5971:palmitate biosynthesis (type II fatty acid synthase)                  | 1220.4<br>(956.8, 2168.6)     | 425.6<br>(183.9, 950.2)       | 1012.1<br>(453.1, 1643.1)     | 375.5<br>(174.8, 679.7)       | -0.56 | 0.004 | 0.016 |
| PWY-5989:stearate biosynthesis II (bacteria and plants)                        | 985.3<br>(861.1, 2239.8)      | 766.6<br>(242.7, 1095.7)      | 1234.9<br>(554, 1638.5)       | 667.8<br>(367.4, 974.2)       | 0     | 0.014 | 0.045 |
| PWY-724:superpathway of L-lysine, L-threonine and L-methionine biosynthesis II | 8725.8<br>(8445.8, 8862.5)    | 9058.3<br>(8716.6, 9149.9)    | 8984.3<br>(8737.7, 9206.3)    | 9209.7<br>(8915.6, 9442)      | -1.04 | 0.048 | 0.113 |
| SER-GLYSYN-PWY:superpathway of L-serine and glycine biosynthesis I             | 6478.6<br>(5872.4, 6783.4)    | 7050.5<br>(6716.9, 7581.1)    | 6911.8<br>(6714.7, 7098.2)    | 7662.9<br>(6386.2, 7963.4)    | -0.86 | 0.058 | 0.12  |
| PWY-7219:adenosine ribonucleotides de novo biosynthesis                        | 15638.6<br>(14912.5, 16817)   | 17283.4<br>(16468, 17787)     | 16773.3<br>(15866.5, 17655)   | 16772.6<br>(16249.9, 17671.5) | -0.14 | 0.024 | 0.07  |
| PWY0-1298:superpathway of pyrimidine deoxyribonucleosides degradation          | 405.3<br>(284.6, 757.3)       | 255.2<br>(181, 344.9)         | 373.9<br>(270.8, 555.2)       | 359.4<br>(155, 603.3)         | 0.14  | 0.044 | 0.11  |
| PWY-6700:queuosine biosynthesis I (de novo)                                    | 10080.7<br>(9478.6, 11298.7)  | 10977.4<br>(10299.5, 11788.1) | 11091.7<br>(10455.6, 11948.4) | 11452.2<br>(10787, 11597.5)   | 0.21  | 0.083 | 0.145 |
| P621-PWY:nylon-6-oligomer-degradation                                          | 29.9<br>(4.1, 45.3)           | 0 (0, 10)                     | 21<br>(0, 33.8)               | 9.2<br>(0, 37.2)              | 0.31  | 0.038 | 0.099 |
| PWY-6122:5-aminoimidazole ribonucleotide biosynthesis II                       | 10686.8<br>(9866.2, 11680.2)  | 11785.3<br>(10707.7, 12553.1) | 12117.3<br>(11353.9, 12394)   | 11858.8<br>(11411.5, 12437.8) | 0     | 0.083 | 0.145 |
| PWY-6277:superpathway of 5-aminoimidazole ribonucleotide biosynthesis          | 10686.8<br>(9866.2, 11680.2)  | 11785.3<br>(10707.7, 12553.1) | 12117.3<br>(11353.9, 12394)   | 11858.8<br>(11411.5, 12437.8) | -1.39 | 0.083 | 0.145 |
| TRNA-CHARGING-PWY:tRNA charging                                                | 11652.8<br>(10760.4, 12091.2) | 12167<br>(11327.6, 13224.3)   | 12182<br>(11355.2, 12891.5)   | 11930.6<br>(11611.5, 12281.2) | 0.25  | 0.33  | 0.419 |

134 \*Log2 fold change, p-values and FDR-adjusted p-values are based on the combined changes  
135 for the erythromycin and azithromycin groups. Pathway abundance are indicated as the  
136 median and interquartile ranges.

137



138 **Table S4. Total faecal bacterial load in conventional and germ mice model studies at**  
 139 **baseline and at day 90.**

| <b>Erythromycin mice model in conventionally raised mice</b>                       |                                                                           |                                                                           |          |
|------------------------------------------------------------------------------------|---------------------------------------------------------------------------|---------------------------------------------------------------------------|----------|
|                                                                                    | <b>Baseline</b>                                                           | <b>ABX</b>                                                                | <b>p</b> |
| <b>Control</b>                                                                     | 1.3 x 10 <sup>7</sup><br>(3.2 x 10 <sup>6</sup> – 1.5 x 10 <sup>7</sup> ) | 2.8 x 10 <sup>7</sup><br>(2.0 x 10 <sup>7</sup> – 3.5 x 10 <sup>7</sup> ) | 0.002    |
| <b>Erythromycin</b>                                                                | 5.7 x 10 <sup>6</sup><br>(1.5 x 10 <sup>6</sup> – 1.2 x 10 <sup>7</sup> ) | 1.3 x 10 <sup>7</sup><br>(4.0 x 10 <sup>6</sup> – 1.8 x 10 <sup>7</sup> ) | 0.451    |
| <b>Erythromycin mice model in germ-free mice</b>                                   |                                                                           |                                                                           |          |
|                                                                                    | <b>Baseline</b>                                                           | <b>Day 90</b>                                                             | <b>p</b> |
| <b>Germ-free mice (GF)</b>                                                         | 4.6<br>(2.6 – 8.0)                                                        | 3.6<br>(2.9 – 4.0)                                                        | 1.0      |
| <b>Germ-free mice receiving erythromycin (GF-ERY)</b>                              | 2.4<br>(2.4 - 3.4)                                                        | 3.8<br>(2.6 – 3.9)                                                        | 1.0      |
| <b>Germ-free mice colonised with control microbiota (Conv-Con)</b>                 | 3.1<br>(2.4 – 4.2)                                                        | 1.0 x 10 <sup>7</sup><br>(8.5 x 10 <sup>6</sup> – 1.3 x 10 <sup>7</sup> ) | <0.001   |
| <b>Germ-free mice colonised with erythromycin-associated microbiota (Conv-ERY)</b> | 4.4<br>(3.1 – 7.7)                                                        | 5.6 x 10 <sup>7</sup><br>(5.2 x 10 <sup>6</sup> – 6.2 x 10 <sup>7</sup> ) | <0.001   |

140 Data represents the median and interquartile ranges of faecal samples (copies of 16S rRNA  
 141 gene/ $\mu$ L). ABX refers to day 90 following treatment with erythromycin ethylsuccinate  
 142 (20mg/kg) or plain drinking water for control mice. The p-values were determined based on a  
 143 linear mixed effects model with the cage effect modelled as random effect.

144

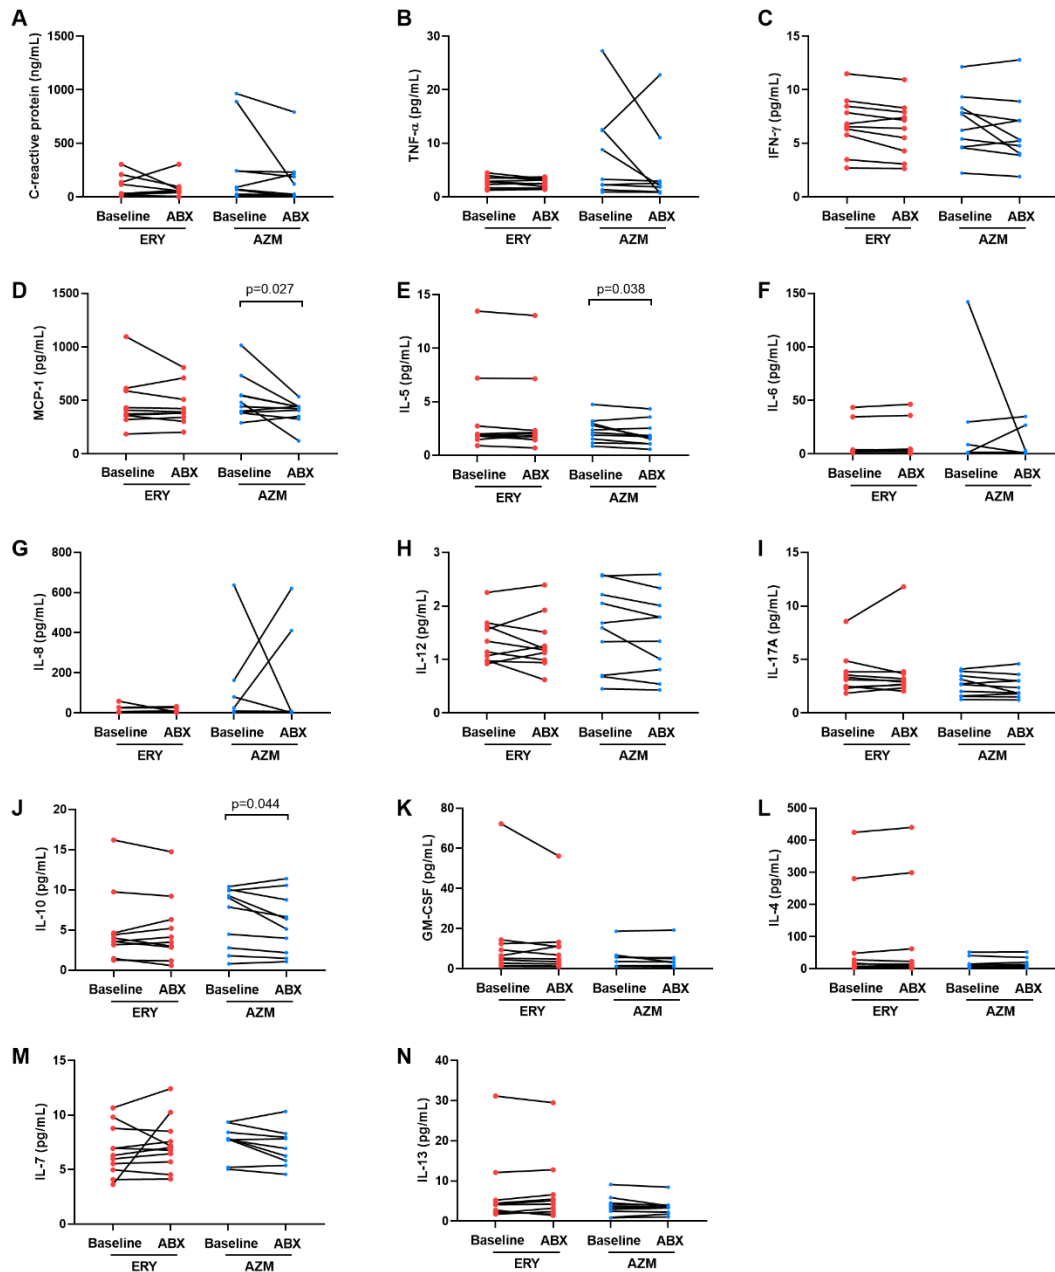

145

146 **Figure S1.** Host serum levels of inflammatory markers at baseline and at the end of 4-weeks  
 147 antibiotic treatment (ABX) for the erythromycin (ERY) or azithromycin (AZM) groups. The  
 148 levels of C-reactive protein (CRP), as well as cytokines and chemokines including tumour  
 149 necrosis factor (TNF)- $\alpha$ , interferon gamma (IFN- $\gamma$ ), monocyte chemoattractant protein 1  
 150 (MCP-1), IL-5, IL-6, IL-8, IL-12, IL-17A, IL-10, granulocyte-macrophage colony stimulating  
 151 factor (GM-CSF), IL-4, IL-7 and IL-13 were determined using single or multiplex  
 152 immunoassays as indicated in the Methods. Other immune-related markers including the  
 153 hepatocyte growth factor (HGF), FGF-2, IL-1 $\beta$  IL-9, as well as the proinflammatory molecule  
 154 lipopolysaccharide (LPS) were also measured but were detected in less than 60% of samples  
 155 in either group and therefore, were not analysed further. Pairwise comparisons were performed  
 156 using a linear mixed model (*lme4* version 1.1-23 and *lmerTest* 3.1-1 package in R), and  
 157 multiple comparison correction of the p-value was performed using the false discovery rate  
 158 (FDR) method. Statistical significance based on FDR  $p < 0.05$  is shown.

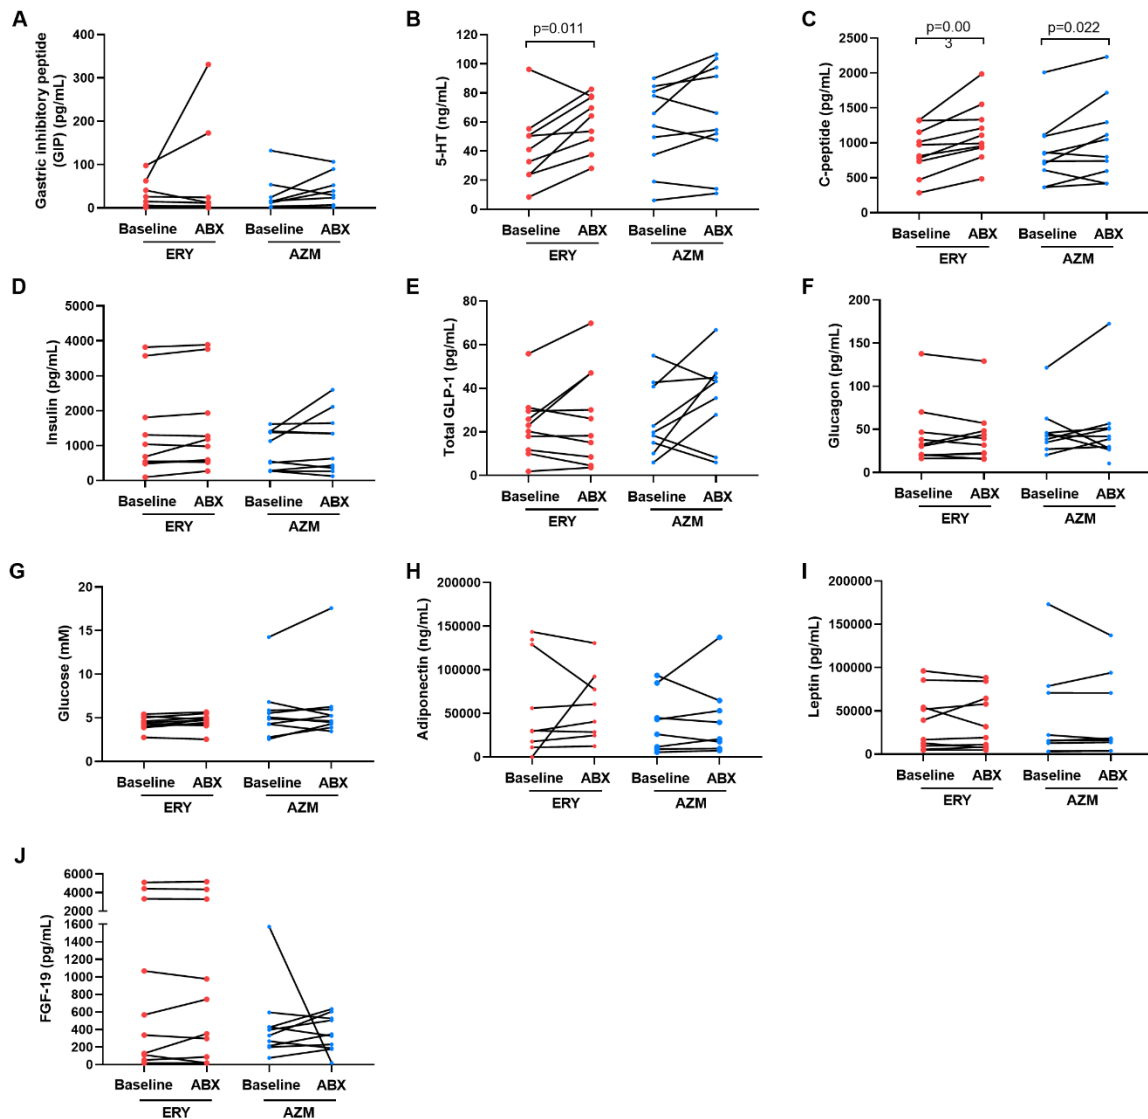

159

160 **Figure S2.** Host serum levels of metabolic markers at baseline and at the end of 4-weeks  
 161 antibiotic treatment (ABX) for the erythromycin (ERY) or azithromycin (AZM) groups. The  
 162 levels of biomarkers including gastric inhibitory peptide, 5-HT (serotonin), C-peptide, insulin,  
 163 total glucagon-like peptide 1 (GLP-1), glucagon, glucose, adiponectin, leptin, and FGF-19  
 164 were determined using single or multiplex immunoassays as indicated in the Methods. Serum  
 165 levels of peptide YY (PYY) were also measured but were detected in less than 60% of samples  
 166 in either group and therefore, were not analysed further. Pairwise comparisons were performed  
 167 using a linear mixed model (*lme4* version 1.1-23 and *lmerTest* 3.1-1 package in R), and  
 168 multiple comparison correction of the p-value was performed using the false discovery rate  
 169 (FDR) method. Statistical significance based on FDR  $p < 0.05$  is shown.

170

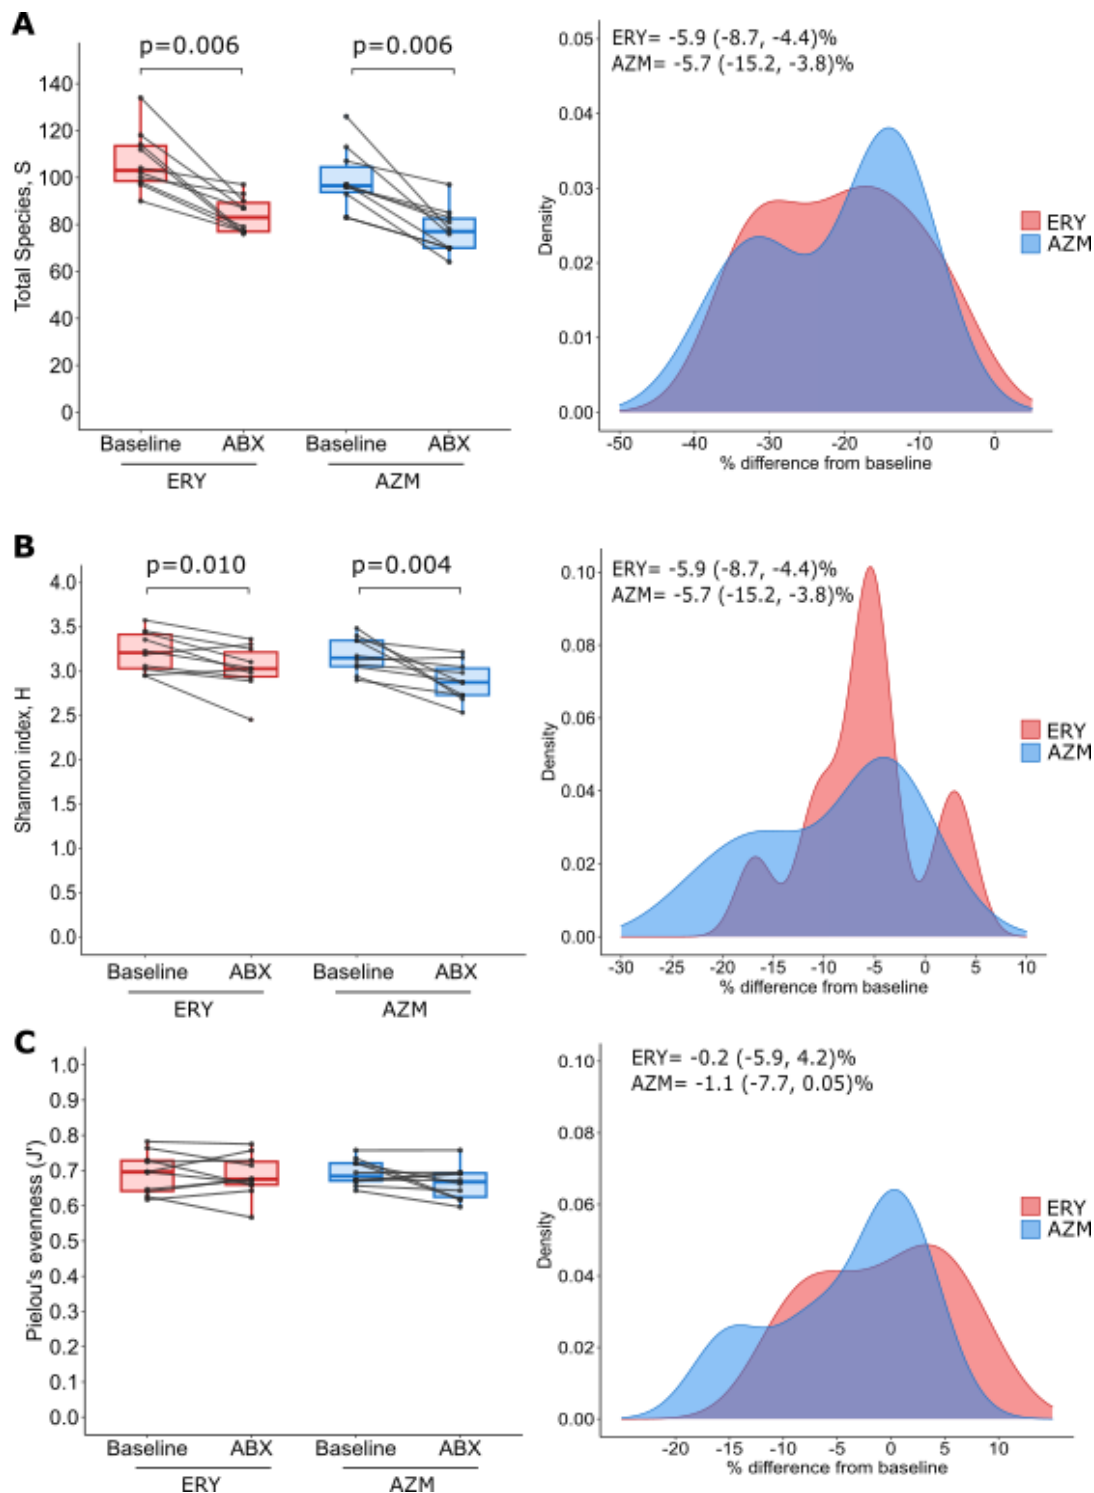

172

173 **Figure S3.** Alpha diversity measures of (A) species richness (Total species, S), (B) diversity  
 174 (Shannon's diversity index (H') evenness (Pielou's J) at baseline and at the end of the 4 weeks  
 175 of macrolide treatment (ABX) with erythromycin (ERY) or azithromycin (AZM). Statistical  
 176 comparisons were performed using the Wilcoxon test at a significance level of  $p < 0.05$ . The  
 177 corresponding density plot for each alpha diversity measure represents the distribution of the  
 178 % of change after 4 weeks of treatment compared to their baseline values. The median and  
 179 interquartile ranges of the % change is indicated.

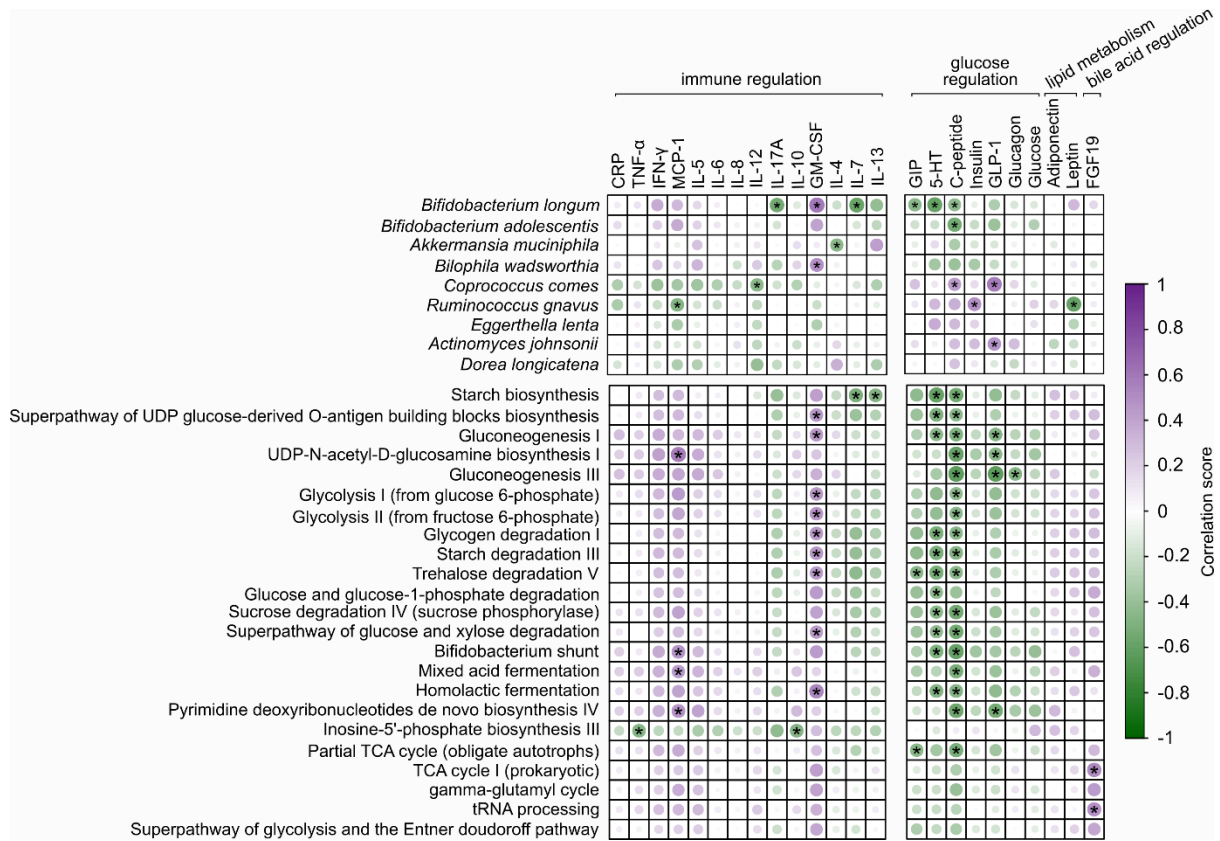

180

181 **Figure S4.** Correlation analysis between significantly altered microbial taxa or functional  
 182 pathways and host biomarkers associated with immune and metabolic regulation. Correlation  
 183 among the paired measures was assessed using the repeated measures correlation R package  
 184 *rmcorr* (v0.5.4). Correlations with a significance level of  $p < 0.05$  are indicated with an  
 185 asterisk (\*).

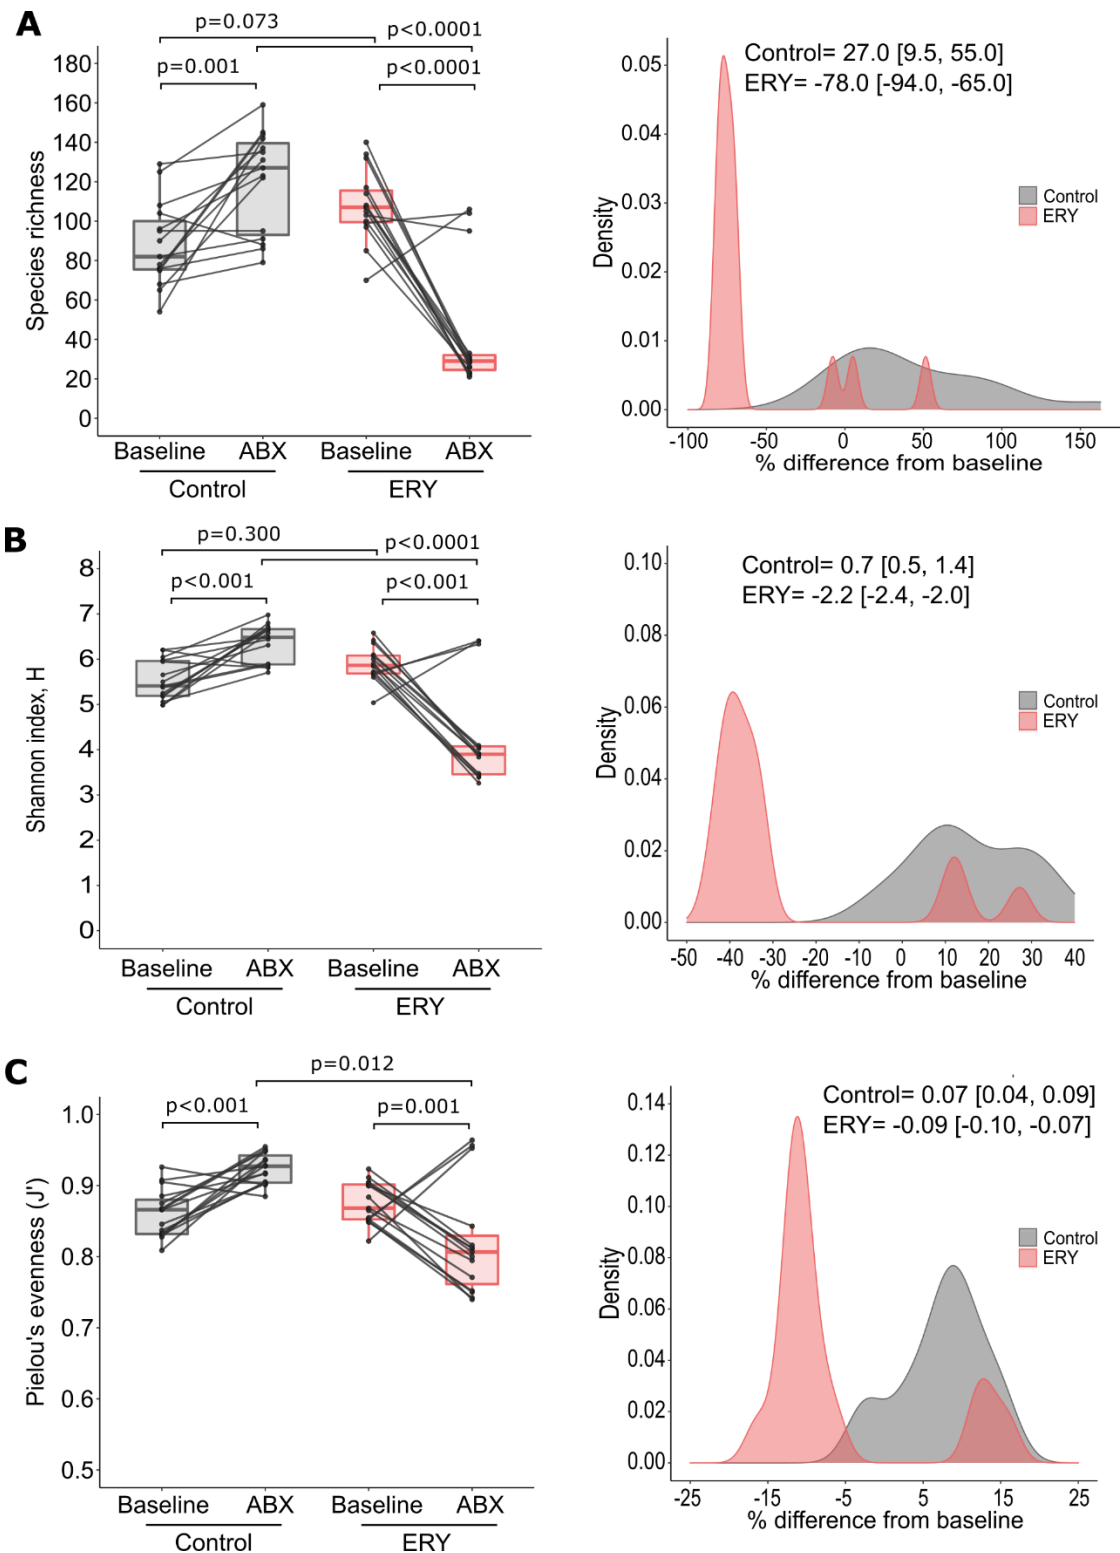

186

187 **Figure S5.** Faecal microbial alpha diversity based on (A) microbial richness (observed  
 188 species), (B) diversity (Shannon's diversity index, H) and (C) evenness (Pielou's J).  
 189 Significance of the changes between paired samples were determined using the Wilcoxon test  
 190 at a level of  $p < 0.05$ . The corresponding density plot for each alpha diversity measure  
 191 represented the % of change at day 90 compared to the baseline values. The median and  
 192 interquartile ranges (first and third quartile, respectively, indicated in brackets) of the % change  
 193 is indicated.

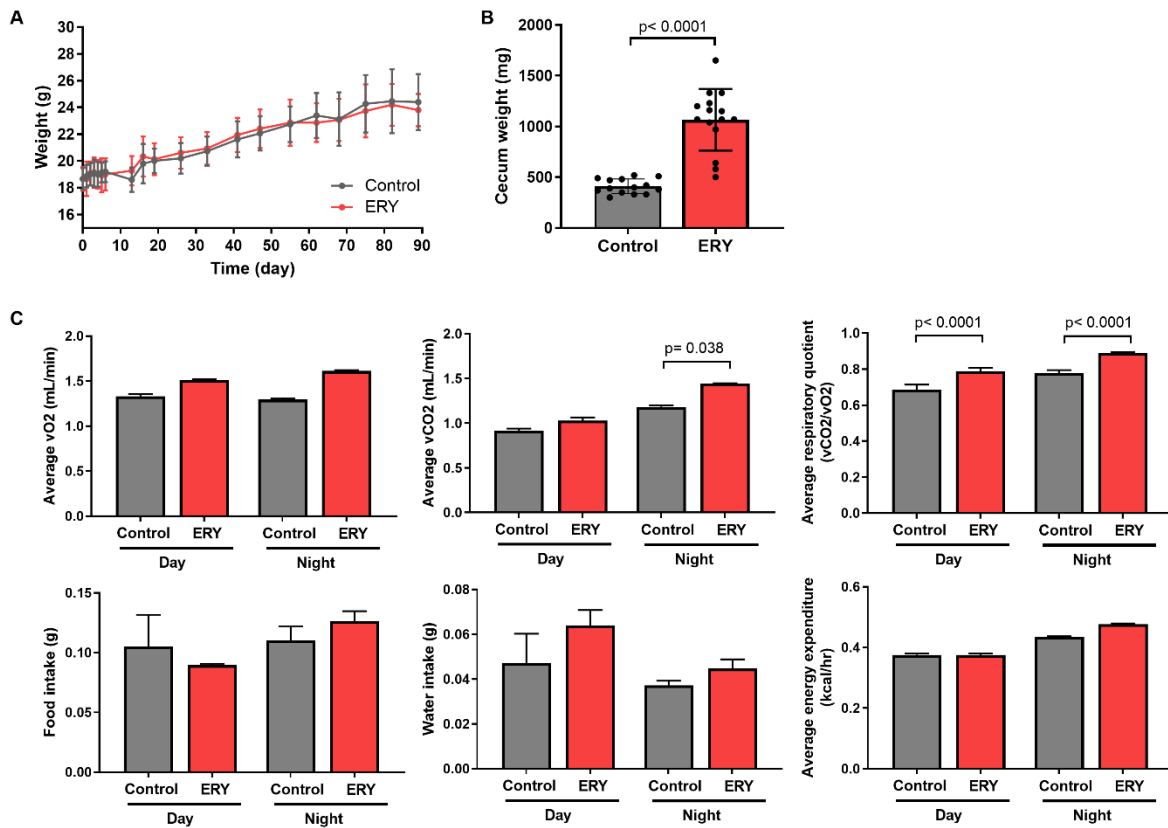

194

195 **Figure S6.** Physiological assessment of conventional mice exposed to erythromycin in  
 196 drinking water (ERY) or control mice based on body weight over the 90 days study, and cecum  
 197 weight at the end of the 90-day treatment (n=15 per group). (C) Metabolic output of individual  
 198 erythromycin-treated (ERY) and control mice (n=3/group) were measured at the end of the 90-  
 199 day treatment. Metabolic assessments were based on the average of the volume of CO<sub>2</sub> exhaled  
 200 (vCO<sub>2</sub>), volume of O<sub>2</sub> inhaled (vO<sub>2</sub>), the overall respiratory quotient (calculated based on  
 201 vCO<sub>2</sub>/vO<sub>2</sub>), food intake, water intake and the average energy expenditure. Readings were  
 202 performed over the day and night cycles using a Promethion cage system (n=3 per group). The  
 203 bars and error graphs for body weight and cecum weight were represented by the mean and  
 204 standard deviation, while metabolic output were represented by the median and interquartile  
 205 ranges. Statistical comparisons for body weight, cecum weight and metabolic measures were  
 206 performed using a linear mixed effects model, unpaired t-test and Mann-Whitney t-test,  
 207 respectively, with significance determined at p<0.05.

208

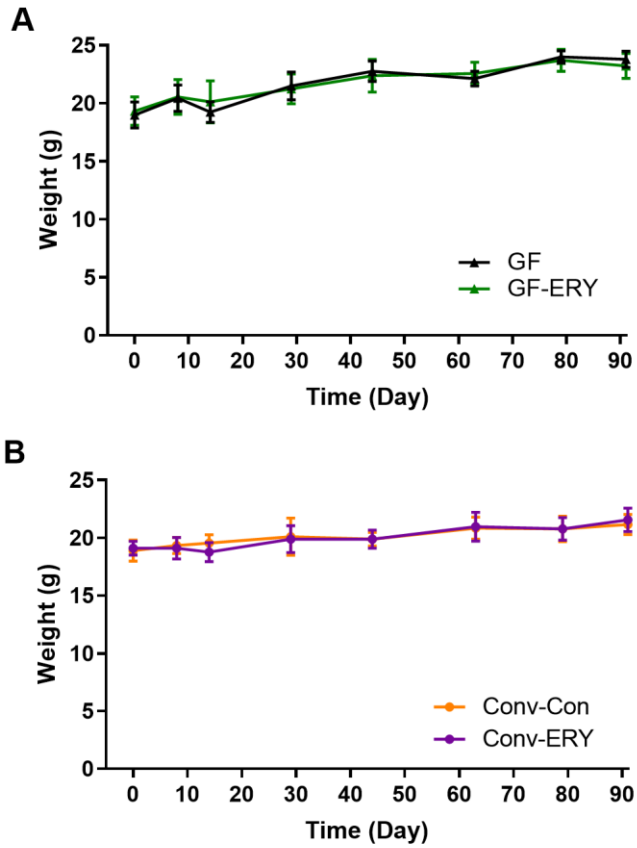

209  
 210 **Figure S7.** Physiological assessment of body weight of (A) germ-free mice that received  
 211 erythromycin (20mg/kg) or water (n=7 per group), and (B) germ-free mice transplanted with  
 212 erythromycin-associated microbiota or control microbiota (n=9 per group) over 90 days. Data  
 213 are presented as the mean and the error bars represent the standard deviation. Statistical  
 214 comparison between groups were performed using a linear mixed effects model, with  
 215 significance determined at  $p < 0.05$ .  
 216



217 **REFERENCES**

218

219 1. Burr, L. D., S. L. Taylor, A. Richard, V. Schreiber, S. Lingman, M. Martin, L. E.  
220 Papanicolas, J. M. Choo and G. B. Rogers (2022). Assessment of Long-Term Macrolide  
221 Exposure on the Oropharyngeal Microbiome and Macrolide Resistance in Healthy Adults and  
222 Consequences for Onward Transmission of Resistance. *Antimicrob Agents Chemother* 66,  
223 e0224621.

224

225 2. Wei, S., M. S. Mortensen, J. Stokholm, A. D. Brejnrod, J. Thorsen, M. A. Rasmussen,  
226 U. Trivedi, H. Bisgaard and S. J. Sorensen (2018). Short- and long-term impacts of  
227 azithromycin treatment on the gut microbiota in children: A double-blind, randomized,  
228 placebo-controlled trial. *EBioMedicine* 38, 265-272.

229

230 3. Doan, T., A. M. Arzika, K. J. Ray, S. Y. Cotter, J. Kim, R. Maliki, L. Zhong, Z. Zhou,  
231 T. C. Porco, B. Vanderschelden et al. (2017). Gut Microbial Diversity in Antibiotic-Naive  
232 Children After Systemic Antibiotic Exposure: A Randomized Controlled Trial. *Clin Infect Dis*  
233 64, 1147-1153.

234

235 4. Nair, A. B. and S. Jacob (2016). A simple practice guide for dose conversion between  
236 animals and human. *J Basic Clin Pharm* 7, 27-31.

237

238 5. Truong, D. T., E. A. Franzosa, T. L. Tickle, M. Scholz, G. Weingart, E. Pasolli, A. Tett,  
239 C. Huttenhower and N. Segata (2015). MetaPhlAn2 for enhanced metagenomic taxonomic  
240 profiling. *Nat Methods* 12, 902-903.

241

242 6. Mobegi, F. M., L. E. Leong, F. Thompson, S. M. Taylor, L. R. Harriss, J. M. Choo, S.  
243 L. Taylor, S. L. Wesselingh, R. McDermott, K. L. Ivey et al. (2020). Intestinal microbiology  
244 shapes population health impacts of diet and lifestyle risk exposures in Torres Strait Islander  
245 communities. *Elife* 9.

246

247 7. Choo, J. M., C. D. Tran, N. D. Luscombe-Marsh, W. Stonehouse, J. Bowen, N.  
248 Johnson, C. H. Thompson, E. J. Watson, G. D. Brinkworth and G. B. Rogers (2021a). Almond  
249 consumption affects fecal microbiota composition, stool pH, and stool moisture in overweight  
250 and obese adults with elevated fasting blood glucose: A randomized controlled trial. *Nutr Res*  
251 85, 47-59.

252

253 8. Choo, J. M. and G. B. Rogers (2021b). Establishment of murine gut microbiota in  
254 gnotobiotic mice. *iScience* 24, 102049.

255

256 9. Dey, N., V. E. Wagner, L. V. Blanton, J. Cheng, L. Fontana, R. Haque, T. Ahmed and  
257 J. I. Gordon (2015). Regulators of gut motility revealed by a gnotobiotic model of diet-  
258 microbiome interactions related to travel. *Cell* 163, 95-107.
